# Supplementary material for: Decoration of TiO2/g-C3N4 Z-scheme by carbon dots as a novel photocatalyst with improved visible-light photocatalytic performance for the degradation of enrofloxacin
Source: Royal Society of Chemistry journal article supplement (doi:10.1039/c7ra05485h), 2017-01-01
Supplement: c7ra05485h1.pdf [file c7ra05485h1.pdf]

# **Decoration of TiO<sub>2</sub>/g-C<sub>3</sub>N<sub>4</sub> Z-scheme by Carbon Dots as a Novel Photocatalyst with Improved Visible-Light Photocatalytic Performance for the Degradation of Enrofloxacin**

Yuehan Su,<sup>a</sup> Ping Chen,<sup>a</sup> Fengliang Wang,<sup>a</sup> Qianxin Zhang,<sup>a</sup> Tiansheng Chen,<sup>a</sup> Yingfei Wang,<sup>a</sup>  
Kun Yao,<sup>a</sup> Wenying Lv,<sup>a</sup> and Guoguang Liu<sup>\*a</sup>

School of Environmental Science and Engineering, Institute of Environmental Health and  
Pollution Control, Guangdong University of Technology, Guangzhou, 510006, China

## **Corresponding Author:**

\* Corresponding Author: Guoguang Liu

E-mail: [liugg615@163.com](mailto:liugg615@163.com)

Telephone: +86-20-39322547

Fax: +86-20-39322548

## Calculation of energy band

**Table S1** Energy band structure parameters of g-C<sub>3</sub>N<sub>4</sub> and TiO<sub>2</sub>

| catalyst                        | X(eV) | E <sub>c</sub> (eV) | E <sub>g</sub> (eV) | E <sub>VB</sub> (eV) | E <sub>CB</sub> (eV) |
|---------------------------------|-------|---------------------|---------------------|----------------------|----------------------|
| TiO <sub>2</sub>                | 5.81  | 4.50                | 3.22                | +2.92                | -0.3                 |
| g-C <sub>3</sub> N <sub>4</sub> | 4.72  |                     | 2.58                | +1.51                | -1.07                |
